# Supplementary material for: Fluorescence signaling systems for sensing Hg(ii) ion derived from A2B-corroles
Source: Royal Society of Chemistry journal article supplement (doi:10.1039/c2dt12158a), 2012-01-01
Supplement: c2dt12158a.pdf [file c2dt12158a.pdf]

## Supplementary Information for

### **Fluorescence signaling systems for sensing Hg(II) ion derived from A<sub>2</sub>B-corroles**

Anand Pariyar,<sup>a</sup> Suranjana Bose,<sup>a</sup> Satyadeep Singh Chhetri,<sup>a</sup> Achintesh Narayan Biswas<sup>b</sup> and Pinaki Bandyopadhyay\*<sup>a</sup>

a) Department of Chemistry, University of North Bengal, Raja Rammohunpur, Siliguri 734013, India.

b) Department of Chemistry, Siliguri College, Siliguri 734001, India.

## Contents:

Table S1. Table showing absorbance of corrole 1-4 in toluene and dichloromethane.

Fig S1. Figure showing interference of metal ion on Hg<sup>2+</sup> detection.

Fig S2. Determination of association constant..

Table S2. <sup>1</sup>H NMR chemical shifts (ppm) in CDCl<sub>3</sub> for the A<sub>2</sub>B-corroles (**1-4**)

Fig S3. <sup>1</sup>H NMR spectrum of **4**.

Fig S4. ESI-MS spectrum of the free base corrole **4**.

**Table S1:** UV-Visible absorption and the extinction coefficient of the corroles1-4 in toluene and dichloromethane.

| Corroles | Solvents                        | $\lambda_{\text{max}} / \text{nm} (\epsilon / \text{m}^{-1} \text{cm}^{-1})$ |
|----------|---------------------------------|------------------------------------------------------------------------------|
| 1        | Toluene                         | 448 (10,200), 595 (2,830)                                                    |
|          | CH <sub>2</sub> Cl <sub>2</sub> | 424 (15,800), 594 (3,150)                                                    |
| 2        | Toluene                         | 448 (17,500), 596 (6,900)                                                    |
|          | CH <sub>2</sub> Cl <sub>2</sub> | 426 (54,950), 597 (12,800)                                                   |
| 3        | Toluene                         | 445 (31,470), 599 (11,700), 638 <sup>sh</sup> (11,200)                       |
|          | CH <sub>2</sub> Cl <sub>2</sub> | 437 (40,800), 595 (13,400), 635 <sup>sh</sup> (12,550)                       |
| 4        | Toluene                         | 448 (34,400), 591 (11,544), 662 (11,400)                                     |
|          | CH <sub>2</sub> Cl <sub>2</sub> | 439 (60,100), 592 (20,300), 652 (19,400)                                     |

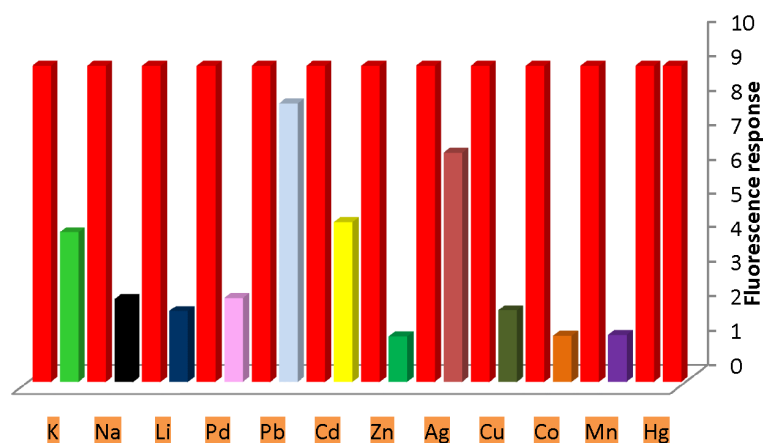

**Figure S1.**  $\text{Hg}^{2+}$  ion sensing in presence of other metal ion. The fluorescence response ( $F_0/F$ ) in presence of divalent metal ion is plotted.  $F_0$ =fluorescence intensity in absence of any metal ion &  $F$ = fluorescence intensity in the presence of metal ions. Initial red bar shows the extent of quenching by  $\text{Hg}^{2+}$  ion and respective coloured bar signifies  $\text{Hg}^{2+}$  ion quenching in presence of divalent metal ion.

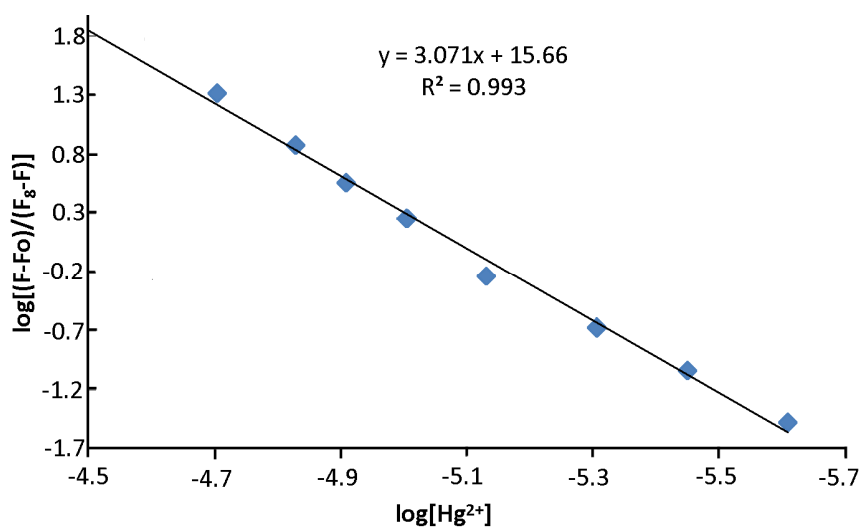

**Figure S2.** A plot for the determination of association constant for **4** with  $\text{Hg}^{2+}$  ion ;  $\log$  of the ratio of  $(F-F_0)$  over  $(F_8-F)$  versus  $\log$  of the free  $\text{Hg}^{2+}$  ion concentration.  $F_0$ =fluorescence intensity in the absence of  $\text{Hg}^{2+}$  ion ;  $F_8$ =fluorescence intensity in the presence of excess  $\text{Hg}^{2+}$  ion.  $F$ = fluorescence intensity at a given amount of  $\text{Hg}^{2+}$  ion. For detail derivation please refer X. J. Zhu, S. T. Fu, W. K. Wong, J. P. Guo, W. Y. Wong, *Angew. Chem.*, 2006, **118**, 3222.

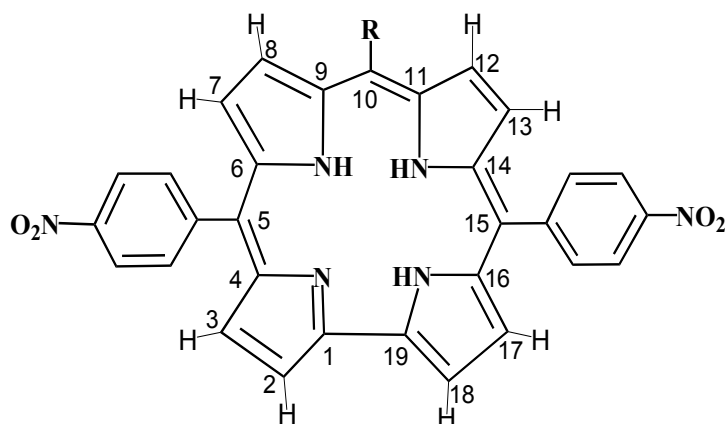

**Table S2.**  $^1\text{H}$  NMR chemical shifts (ppm) in  $\text{CDCl}_3$

| Corrole                   | $^1\text{H}_a(2, 18)$ | $^1\text{H}_c(7,13)$ | $^1\text{H}_b(3,17)$                     | $^1\text{H}_d(8,12)$ | Reference                                            |
|---------------------------|-----------------------|----------------------|------------------------------------------|----------------------|------------------------------------------------------|
| <b>1</b>                  | 9.102                 | 8.899                | 8.650<br>(overlapped)                    |                      | This work                                            |
| <b>2</b>                  | 9.054                 | 8.862                | 8.695                                    | 8.374                | This work                                            |
| <b>3</b>                  | 9.075                 | 8.758                | 8.626<br>(overlapped with<br>naphthyl-H) | 8.352                | This work                                            |
| <b>4</b>                  | 8.957                 | 8.778                | 8.611<br>( overlapped )                  |                      | This work                                            |
| $\text{H}_3(\text{tpfc})$ | 9.100                 | 8.750                | 8.570<br>(2d overlapping, 4H)            |                      | <i>Magn. Reson. Chem.</i> 2004; <b>42</b> : 624–635. |

The electronic communication within the whole corrole molecules is evident from the chemical shift value of the  $\beta$ -pyrrolic hydrogens. The higher deshielding of the 2, 18-hydrogen and its high resembles to that of free base 5,10,15-tris(pentafluorophenyl)corrole signifies that the electronic communication or electron withdrawl by the nitro-phenyl group in the studied A2B corroles. This effect further stabilise the macrocycle to a greater extent. In case of corrole **2** and **3** an appreciable overlap between the 3, 17, 8, 12 hydrogens with that of hydrogens from meso-dimethylphenyl and tridecyloxyphenyl group has been found. Chemical shift value for meso-phenyl hydrogens are given in the text in the experimental section. In all the cases the signals for the NH protons were not detected.

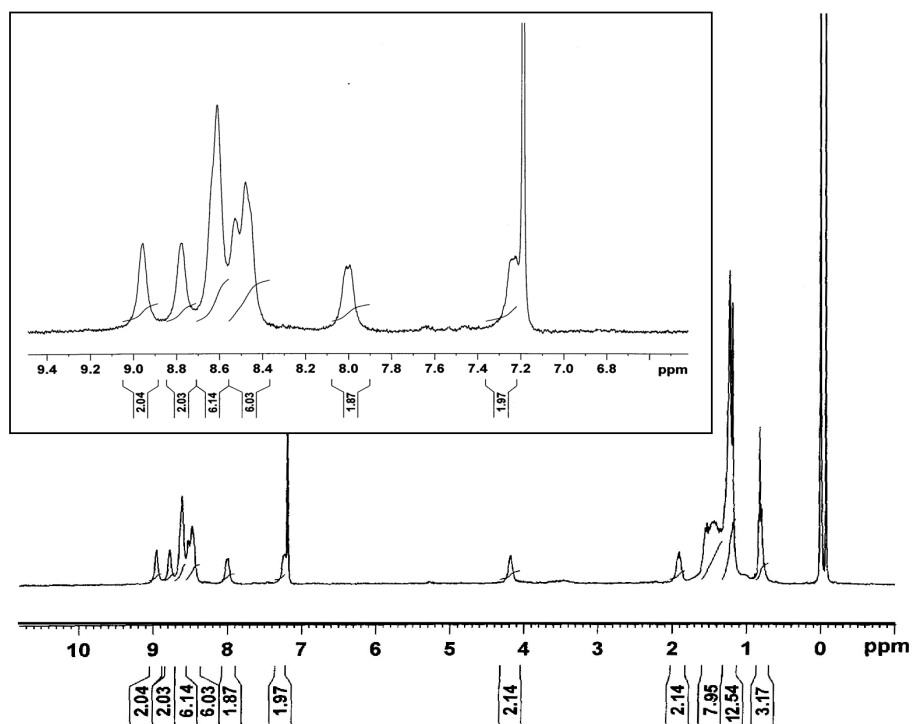

Figure S3.  $^1\text{H}$  NMR spectrum of 4. Inset shows the extended aromatic region.

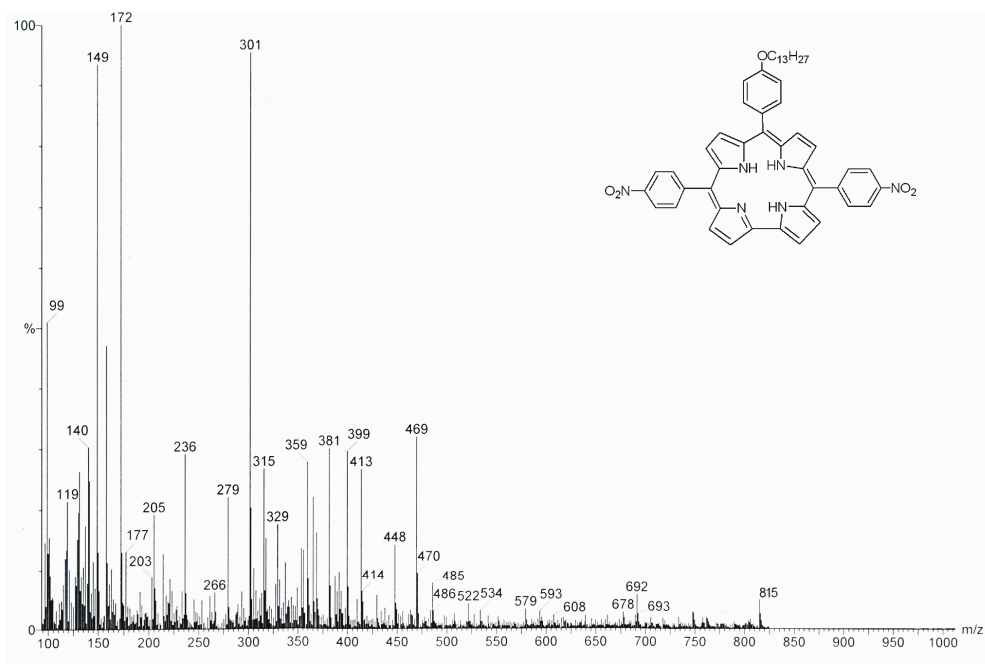

Figure S4. ESIMS spectrum of 4.
